# Supplementary material for: Local and Systemic Regulation of Plant Root System Architecture and Symbiotic Nodulation by a Receptor-Like Kinase
Source: PubMed Central journal article supplement (PMC4270686; doi:10.1371/journal.pgen.1004891), 2014-12-18
Supplement: pgen.1004891.s001.pdf [file pgen.1004891.s001.pdf]

**A**

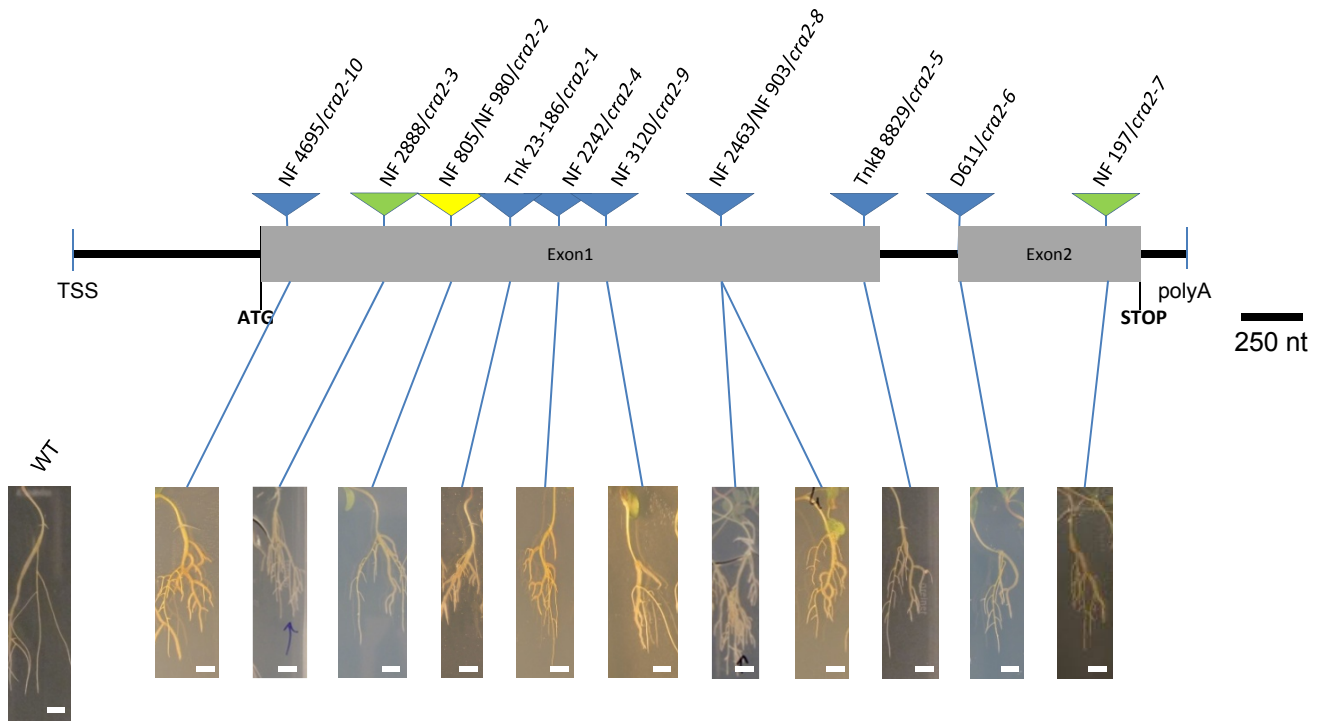

**B**

|               | <i>cra2.2</i> | <i>cra2.5</i> | <i>cra2.6</i> | <i>cra1.1</i> |
|---------------|---------------|---------------|---------------|---------------|
| <i>cra2.1</i> | yes           | yes           | yes           | no            |
| <i>cra2.2</i> |               | yes           | yes           | no            |
| <i>cra2.5</i> |               |               | yes           | no            |
| <i>cra2.6</i> |               |               |               | no            |

**Supplementary Figure 1. Allelism tests and root system architecture phenotypes of the various *cra2* mutant alleles.**

**A.** Representative examples of wild-type (WT) and *cra2* (alleles 1 to 10) root systems that were grown *in vitro* for two weeks on an N-deprived “i” medium (42). The blue arrowheads are alleles that are tagged by the *Tnt1* retro-element insertion; the green arrowheads are alleles that are tagged by another insertional element; and the yellow arrowhead is an allele containing a deletion of one nucleotide. Bars = 0,5 cm.

**B.** Allelism test between different *cra2* alleles as well as with the previously described *cra1* mutant (32). “yes” means that both of the mutants are allelic.
