# Supplementary material for: Local and Systemic Regulation of Plant Root System Architecture and Symbiotic Nodulation by a Receptor-Like Kinase
Source: PubMed Central journal article supplement (PMC4270686; doi:10.1371/journal.pgen.1004891), 2014-12-18
Supplement: pgen.1004891.s003.pdf [file pgen.1004891.s003.pdf]

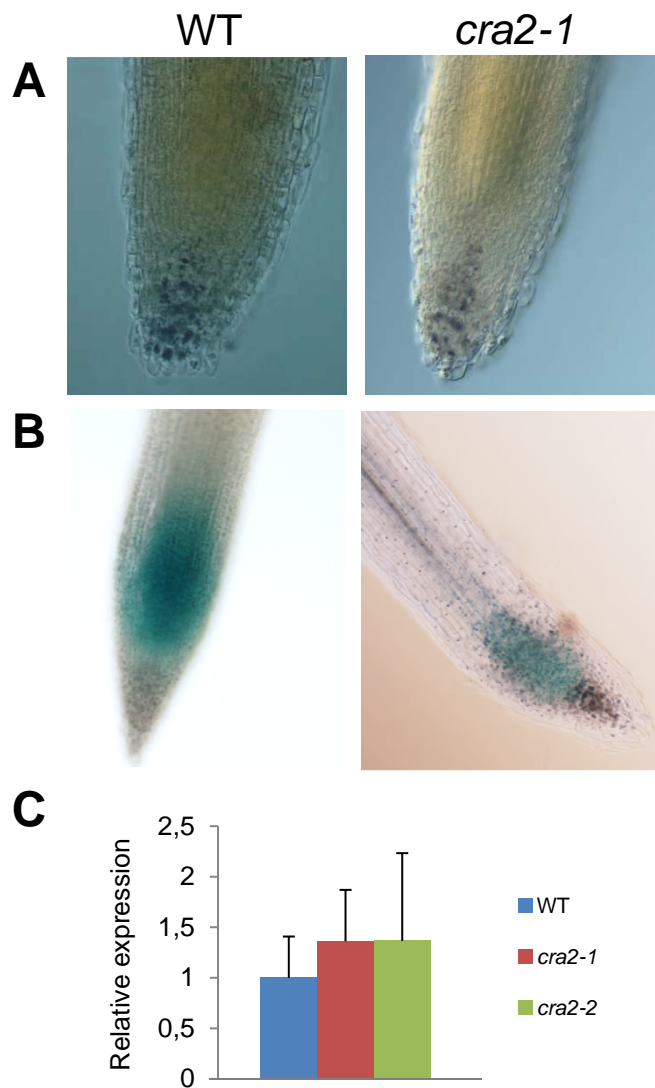

**Supplementary Figure 3. Expression of the root apical meristem markers**

**A.** Amyloplast accumulation in Wild-Type (WT) and *cra2-1* root apical meristems revealed by Lugol staining.

**B.** Expression of the  $P_{WOX5}$ :GUS transcriptional fusion in the WT and *cra2-1* root apical meristems.

**C.** Real-time RT-PCR analysis of *WOX5* expression in the WT and *cra2-1* or *cra2-2* roots. *ACTIN11*, *RBP1* and *H3L* genes were used as references (48).

The expression was normalized relative to that of the WT, and the error bars represent standard deviations (n = 3).
