# Supplementary material for: Local and Systemic Regulation of Plant Root System Architecture and Symbiotic Nodulation by a Receptor-Like Kinase
Source: PubMed Central journal article supplement (PMC4270686; doi:10.1371/journal.pgen.1004891), 2014-12-18
Supplement: pgen.1004891.s004.pdf [file pgen.1004891.s004.pdf]

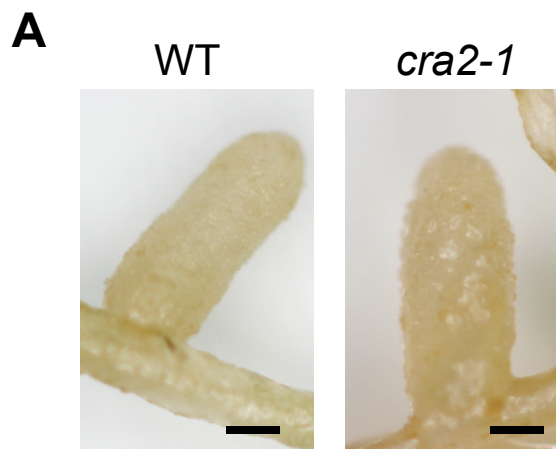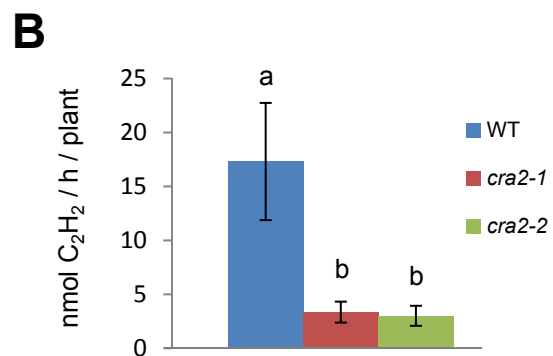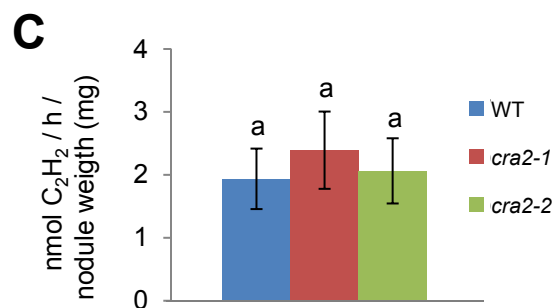

**Supplementary Figure 4. *cra2* nodules are elongated and fix nitrogen**

**A.** Picture of a representative elongated nodule from a Wild-Type (WT) or a *cra2-1* plant. Bar = 500  $\mu$ m

**B.** Nitrogen fixation activity of the WT and *cra2* plants (*cra2-1* and *cra2-2* alleles) six weeks post-inoculation with Rhizobium was determined using an Acetylene Reduction Assay (ARA).

**C.** Specific nitrogen-fixation activity of WT and *cra2* nodules (*cra2-1* and *cra2-2* alleles) from plants shown in **(B)**, corresponding to the ARA activity per milligram of nodule.

In **B** and **C**, a Kruskal and Wallis test was performed ( $\alpha < 5\%$ ;  $n = 10$ ), and the letters indicate significant differences.
