# Supplementary material for: Local and Systemic Regulation of Plant Root System Architecture and Symbiotic Nodulation by a Receptor-Like Kinase
Source: PubMed Central journal article supplement (PMC4270686; doi:10.1371/journal.pgen.1004891), 2014-12-18
Supplement: pgen.1004891.s007.pdf [file pgen.1004891.s007.pdf]

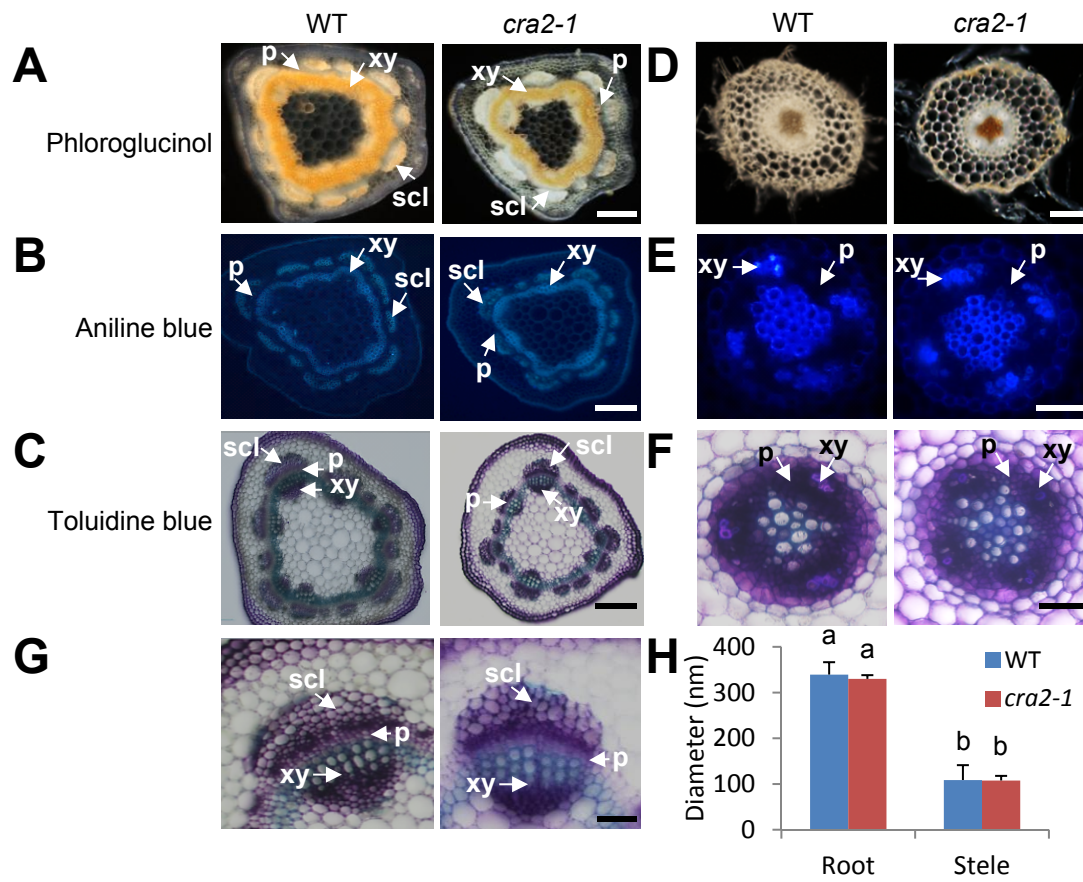

**Supplementary Figure 7. *cra2* roots and shoots do not present any detectable defect in vascular bundle patterning**

**A-G**, Representative examples of stem (**A-G**) or root (**D-F**) transversal sections of wild-type (WT) and *cra2-1* plants that were grown for two months and observed after different stainings: **A** and **D**, phloroglucinol staining lignin in red and sclerenchyma in white; **B** and **E**, aniline blue staining callose in blue under UV illumination; and **C**, **F** and **G**, toluidine blue staining xylem (Xy) and phloem (Phl) in blue and sclerenchyma (scl) in violet (the detail of a stem vascular bundle is shown in **G**). Bars = 150  $\mu$ m in **A** and **B**; 50  $\mu$ m in **C-G**.

**H**, Quantification of the diameter of the roots and root steles based on transversal sections at one cm above the root apex in the WT and *cra2-1* plants that were grown in a greenhouse on a perlite-sand mixture for one month. The error bars represent standard deviations, and a Kruskal and Wallis test was used to determine the significant differences (indicated by letters,  $\alpha < 5\%$ ,  $n = 15$ ).
