# Supplementary material for: Local and Systemic Regulation of Plant Root System Architecture and Symbiotic Nodulation by a Receptor-Like Kinase
Source: PubMed Central journal article supplement (PMC4270686; doi:10.1371/journal.pgen.1004891), 2014-12-18
Supplement: pgen.1004891.s008.pdf [file pgen.1004891.s008.pdf]

**Genotyping and sequencing**

CRA2 1F TTCAGATTTCCCTTCGGC  
CRA2 1R CATCTTTGCTAAAGAGGCTTTATGT  
CRA2 2F AAATGTGGGAGCAGCAATTC  
CRA2 2R TGGAAAGGTTTGTGAGTGGATG  
CRA2 3F TTCTCTTTACACATAGTGG  
CRA2 3R CGGAAAGTGATGACCAACCT  
CRA2 4F GGTCAAATTCACCATCCAT  
CRA2 4R CCAGAGAAAAAGTTATCCAAAACAA  
CRA2 5F GGAGACATCATAAGTCTTG  
CRA2 5R TGCAAGTTTTTCAACAATCCA  
CRA2 6F GGTCAAATTCAAAAGAAGTGG  
CRA2 6R GGAACAGAACCTTCCAAACG  
CRA2 7F ACTTCCTTGTTGGCAGCATC  
CRA2 7R CCTTTTGAACAGAACCTTCC  
CRA2 8F GGTTTCGTGTCAGTAATAACCG  
CRA2 8R TCCCTGCAAAGCTTTCAACT  
CRA2 9F TCCTAAATTGATTAAGGAGG  
CRA2 9R CCAAGTGTTCACCTCAGC  
CRA2 10F AAGATGCATTATTTGTGGACAAGGC  
CRA2 10R TTGGCAACAATTTTATATTAAGG  
CRA2 11F TGTCATCGACCAAATCACG  
CRA2 11R AGCTCCTTCTTTGCCTTCAA  
CRA2 12F TTGATGGATGGTGTGACAGAA  
CRA2 12R GCAGTCTCTCTTTTGTGTGATG  
CRA2 13F TGCTCCCTCTTACCCTTAAT  
CRA2 13R AGGGACAGAGGTAGGATTTGA  
CRA2 14F TTGAAGGCAAAGAAGGAGCT  
CRA2 14R AACATTGTATTTTGGGTTGC  
CRA2 15F ATGTGTGATGATGCCGGTTA  
CRA2 15R AGGATTGCACTTGGAAATTGC  
CRA2 16F GGATTCATTTGGATTGGCC  
CRA2 16R GGCTTCCCTCCCAGTTAATAATTCC  
CRA2 17F GAACATGTCTGTCAAGGAGG  
CRA2 17R TCCCTGCAAAGCTTTCAACT  
CRA2 18F CGTTCCTGCGAAACTAGGAC  
CRA2 18R ACCGGCATCATCACACATAA  
CRA2 19F GGATTGTTGAAAACTTGC  
CRA2 19R CCTCCTTGACAGACATGTTT  
CRA2 20F TTGTGAAAAATCGAAGAAAGGA  
CRA2 20R AATGCCACCAACAAAATGATC

**Tnt1 display**

LTR4 TACCGTATCTCGGTGCTACA  
LTR6 GCTACCAACCAAACCAAGTCAA  
LTR31 GCTCCTCTCGGGTTCGTGG  
LTR51 CAAAGCTTCACCCTCTAAAGCC  
Adaptator 1 CCCCTCGTAGACTGCGTACC  
Eco-adaptor2 AATTGGTACGCAGTCTACG  
Ase-adaptor2 TAGGTACGCAGTCTACGA  
Eco-1 CTCGTAGACTGCGTACCAA  
Eco-2 CGTAGACTGCGTACCAATT  
Ase-1 CTCGTAGACTGCGTACCTA  
Ase-2 CGTAGACTGCGTACCTAAT

**CRA2 promoter cloning**

pCRA2-F CACCTTGGATTTGGATTTTGTTC  
pCRA2-R TGTGTTGTTTTGTGGTTTGG

**qRT-PCR**

WOX5-5' GCCTGATAGAGTGATTGAGAC  
WOX5-3' GGGTGTTCATTTGTTCTCC

***in situ* hybridization**

CRA2 -F1 TCAGCACAAACCAATCTGAGT  
CRA2 -T7-R1 *TGTAATCGACTCACTATAGGGCTTGCTGTTTGTGGAACTTGA*

*In italics : T7 promoter*
